# Supplementary material
Source: publisher site journal article supplement (https://www.dovepress.com/article/supplementary_file/379381/379381.xlsx)
Supplement: Supplementary file 1 [file 379381.xlsx]

## Sheet: Sheet1
	Table S1. Prescribed medication
Participant	Medication for the heart or blood vessels (e.g., hypertension, angina)																				Medication for mental health (e.g., mood or anxiety related problems)							Medication for breathing problems				Medication for Immune system					Medication for diabetes			Medication for cholesterol		Medication for stomach related problems					Other medication
	ACT - Lisinopril	Apo-Metoprolol/ Metoprolol / Teva-metoprolol	Aldactone	Aspirin	Atrovastatin	Auro-Carvedilol	Bisoprolol / Sandoz-Bisoprolol	Candesartan	Clopidogrel/ Plavix	Dabigatran/Pradaxa	Diltiazem	Perindopril / PMS- Perindopril	Ramipril/Altace	Rivaroxaban/Xarelto	Rosuvastatin / Crestor	Sandoz-Candesartan	Sandoz-Termisartan	Tara-warfarin	Teva-perindopril	Ticagrelor/Brilinta	Amitriptyline	Clonazepam/Klonopin	Duloxetine/Cymbalta	Escitalopram/ Cipralex/ Lexapro	Prochlorazine	Sertraline/Zoloft	Trazadone	Apo-Salvent	Budesonide/Pulmicort	Fluticasone	Zenhale	Apo-azathioprine	Celebrex	Meloxicam	Cyclosporine	Naproxen/ Aleve/ Apronax	Dapagliflozin / Forxiga	Janumet /Sitagliptin /Metformin	Ratio-Metformin	Ezetimibe	Repatha	Esomeprazole / Nexium	Famotidine	Omeprazole	Pantoprazole/Pantaloc	Tecta	Acetaminophen / Tylenol	CBD oil	Ferrous Fumarate
2 MI									X		X				X																									X	X				X
3 MI	X					X			X						X																														X			X
5 MI		X	X												X
6 MI		X		X								X			X																								X
7 MI																		X
8 MI				X								X			X																														X
9 MI																																	X												X
10 MI				X			X		X										X
12 MI				X	X			X						X												X												X		X
13 MI		X
14 MI				X			X		X			X			X	X											X	X			X						X	X					X			X	X		X
3 NoMI				X											X					X																						X
4 NoMI																								X					X	X						X
5 NoMI																							X
8 NoMI
10 NoMI															X
11 NoMI																																															X
13 NoMI																																															X
14 NoMI																									X									X										X
15 NoMI										X																									X
16 NoMI		X											X								X	X
18 NoMI												X			X																							X
19 NoMI																	X															X
Total	1	4	1	6	1	1	2	1	4	1	1	4	1	1	9	1	1	1	1	1	1	1	1	1	1	1	1	1	1	1	1	1	1	1	1	1	1	3	1	2	1	1	1	1	4	1	3	1	1
Total - MI	1	3	1	5	1	1	2	1	4	0	1	3	0	1	6	1	0	1	1	0	0	0	0	0	0	1	1	1	0	0	1	0	1	0	0	0	1	2	1	2	1	0	1	0	4	1	1	1	1
Total NoMI	0	1	0	1	0	0	0	0	0	1	0	1	1	0	3	0	1	0	0	1	1	1	1	1	1	0	0	0	1	1	0	1	0	1	1	1	0	1	0	0	0	1	0	1	0	0	2	0	0
Data not shared: 1 MI; 4 MI
No medication : 2 NoMI; 6 NoMI; 9 NoMI; 17NoMI
[truncated: 7 more columns]
